# Supplementary material for: Preventing Extinction of the Critically Endangered Dactylorhiza incarnata subsp. ochroleuca in Britain Using Symbiotic Seedlings for Reintroduction
Source: MDPI journal article supplement (doi:10.3390/microorganisms9071421), 2021-06-30
Supplement: s1 [file s1]

Supplemental Files

Table S1: DNA sequences of Tul1 and Tul2

|                   |                                                                                       |                                                                                                                                                                                                                                                                                                                                                                                                                                                                                                                                                                                                                                                                           |
|-------------------|---------------------------------------------------------------------------------------|---------------------------------------------------------------------------------------------------------------------------------------------------------------------------------------------------------------------------------------------------------------------------------------------------------------------------------------------------------------------------------------------------------------------------------------------------------------------------------------------------------------------------------------------------------------------------------------------------------------------------------------------------------------------------|
| Sequences of Tul1 | <i>Tul1- Closest match</i><br><i>JX649077</i> ,<br>%ID=96.74<br><i>Tulasnellaceae</i> | GGCGGAGCCGTTTGAACCATGCGTCATGCGTCGTGTTATCCCTCTCGGGACACACGTAAACCCCTTACATGCACAGAGTATGCCTCT<br>TACGAAAACAAACAAAGAAATCACAACCGGTAGCGTTGGATCCCTTGGCACGTTGATCGATGAAGACCGTTGCAAACCTGCGATAAGT<br>GGTGTGATGCGCAAGTCTAAAACTTATAAGTGAATCATCGAATCGTTGAACGCACGACACCGGCTCTATCCGAGCAGGTATGCCCCCT<br>TTGAGCGCCATTATGCCTTCGGAGCATCCGGATTTCTNGTCCGTGATGCCCCGGTTCCGAGGTCCACCGTGCGTCCACGCAGGCGTTCC<br>CTTCAGATGCATTGGAAGGGAAGAGGGCCACGCCGGAACCCATCCGTGTCATGAGACATGCACGAAAAGGACCGCAGCGCCGAAGCC<br>CGGGACGTGTCCGCAGCGAGACCGTCCAGACNCACCTTCGCGGTGAAAACCATNGAATGTGGCCTCACTGGGGTAAGACTACCCGCT<br>AGACTTAAGCATATTAATCAGCGGAGGAAAAAGAACTAACTAGGATTCCCTCAGTAACTGCGAGTGAAGCGGGATGAGCTCAATGTGTGAATCTGGCGG |
| Sequences of Tul1 | <i>Tul2- Closest match</i><br><i>JX649080</i> ,<br>%ID=93.52<br><i>Tulasnellaceae</i> | CTGACTGGTATCTGTTGGTCTTTTCGCGTGATATATGTTAGTCTCCGTTGTCTACCCCAATGAGGTCATGCCTTGCTAGTCCGCGATCCCA<br>GGACCGGACTTGGTGACCAGCCCAACGGCGGTCAAGCACGTCTCAACTCCAGAGGACTCCCGCTCAGGCATTAGAGTACCCATCAGGC<br>GATCGGCGCGACGCAGCTGAGAAACACGATCCAAAGACCGAGGACTCCGAACCTCGGGTCTTCCACAAGGAAAAGACTCCCGAAGAATAAA<br>TGACGCTCAAGGGGCATACCGCAGCCGGATTAGGGCGCGGTGCAATGCGTTCAACAACTCGATGATTACGTATAAGTGGTGGACTTGCG<br>CATCACATCATTTATCGCAATTTGCAACGGTCTTCATCGAATGACGTGCCAAGGGATCCAGCGCTGCCAGTTGTAAAAGTTTACAACGTGTA<br>GACTCACAACGCGGAACGATCTTTAACGTGTGCCTCGAACAGAGGTAACACAGCGACCGCTTTACCTCGTCAGAGGGTCGTTTATCCTCGA<br>CCAGAGCCCTTAACGTCCCAGGACGACGGAACAGAACGTCAAGACGATACTATGATCTTCCGCAT                   |

Table S2: Seed germination using different variants of 03DPR009 at two pH levels.

| Seeds tested using different isolates of the<br><b>Variants of 03DPR009</b> |      |             |
|-----------------------------------------------------------------------------|------|-------------|
| Fungal Isolate                                                              | pH   | Avg. % Germ |
| None                                                                        | 5.50 | 16.1        |
| None                                                                        | 8.5  | 20.1        |
| DP009A                                                                      | 5.50 | 88.3        |
| DP009A                                                                      | 8.50 | 83.9        |
| DP009S1                                                                     | 5.50 | 44.4        |
| DP009S1                                                                     | 8.50 | 43.6        |
| DP009S4                                                                     | 5.50 | 56.8        |
| DP009S4                                                                     | 8.50 | 7.9         |
| DP009S5                                                                     | 5.50 | 12.3        |
| DP009S5                                                                     | 8.50 | 85.8        |
| DP009S3                                                                     | 5.50 | 58.8        |
| DP009S3                                                                     | 8.50 | 82.5        |
| None                                                                        | 5.50 | 12.7        |
| None                                                                        | 8.50 | 17.3        |
| DP009A                                                                      | 5.50 | 19.5        |
| DP009A                                                                      | 8.50 | 6.1         |
| DP009S4                                                                     | 5.50 | 48.7        |
| DP009S4                                                                     | 8.50 | 46.3        |
| DP009S3                                                                     | 5.50 | 24.1        |
| DP009S3                                                                     | 8.50 | 34.1        |
| DP009S1                                                                     | 5.50 | 51.2        |
| DP009S1                                                                     | 8.50 | 34.7        |
| DP009S5                                                                     | 5.50 | 57.7        |
| DP009S5                                                                     | 8.50 | 6.7         |
| None                                                                        | 5.50 | 9.4         |
| None                                                                        | 8.50 | 11.9        |
| DP009A                                                                      | 5.50 | 38.7        |
| DP009A                                                                      | 8.50 | 23.8        |
| DP009S5                                                                     | 5.50 | 12.4        |
| DP009S5                                                                     | 8.50 | 39.5        |
| DP009S3                                                                     | 5.50 | 45.7        |
| DP009S3                                                                     | 8.50 | 32.8        |
| DP009S4                                                                     | 5.50 | 35.3        |
| DP009S4                                                                     | 8.50 | 34          |
| DP009S1                                                                     | 5.50 | 40.4        |
| DP009S1                                                                     | 8.50 | 31.9        |
| None                                                                        | 5.50 | 10.1        |
| None                                                                        | 8.50 | 13.8        |
| DP009S4                                                                     | 5.50 | 23.6        |
| DP009S4                                                                     | 8.50 | 75          |
| DP009S1                                                                     | 5.50 | 68.9        |
| DP009S1                                                                     | 8.50 | 77.7        |
| DP009A                                                                      | 5.50 | 40.4        |
| DP009A                                                                      | 8.50 | 61.2        |
| DP009S5                                                                     | 5.50 | 35.9        |
| DP009S5                                                                     | 8.50 | 71.5        |
| DP009S3                                                                     | 5.50 | 31.4        |
| DP009S3                                                                     | 8.50 | 55.4        |

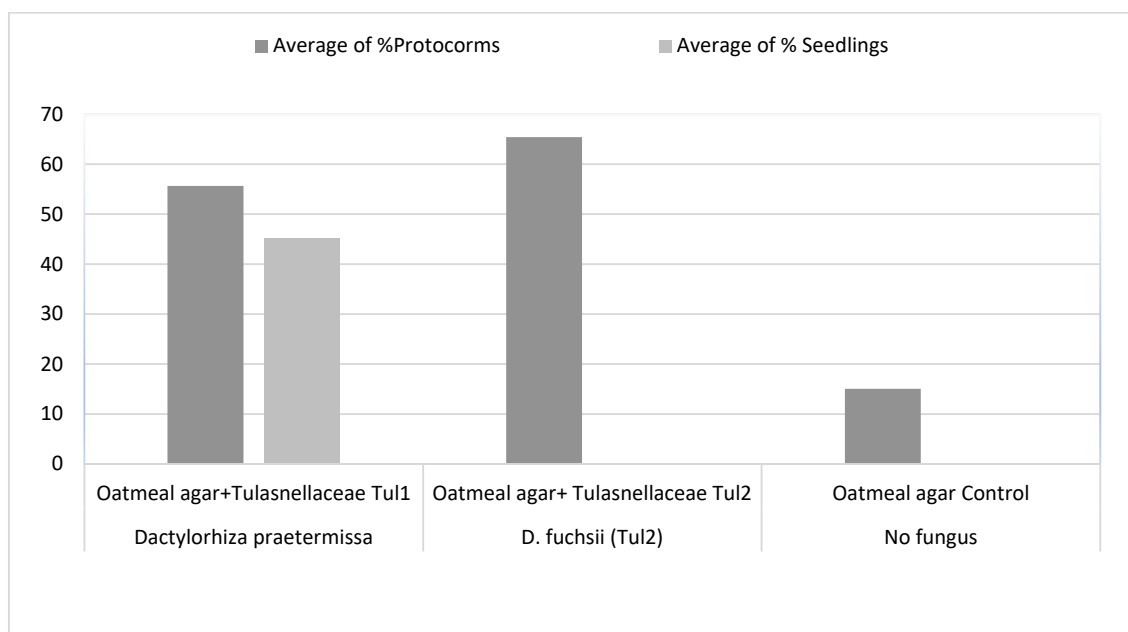

Figure S1, Seed germination: Percentage of seeds germinated to protocorms and seedlings with Tul1, Tul2 and without mycorrhizal fungus (control).

Supplemental Table. Average percentage germination when seeds co-cultured with different variants of Tul1 03DP009 fungus.
